# Supplementary material
Source: PubMed Central journal article supplement (PMC3532042)
Supplement: NIHMS276601-supplement-02.pdf [file NIHMS276601-supplement-02.pdf]

## Figure S1, related to Figure 1 and Figure 2B

A

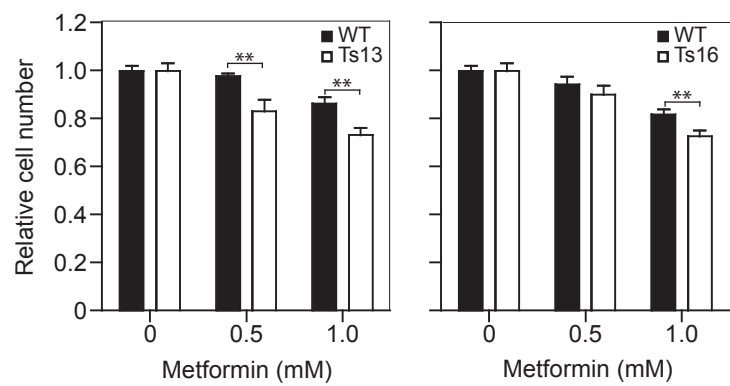

B

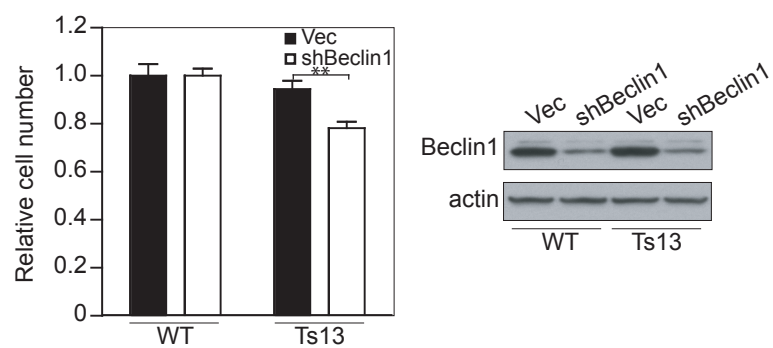

# Figure S2, related to Figure 3

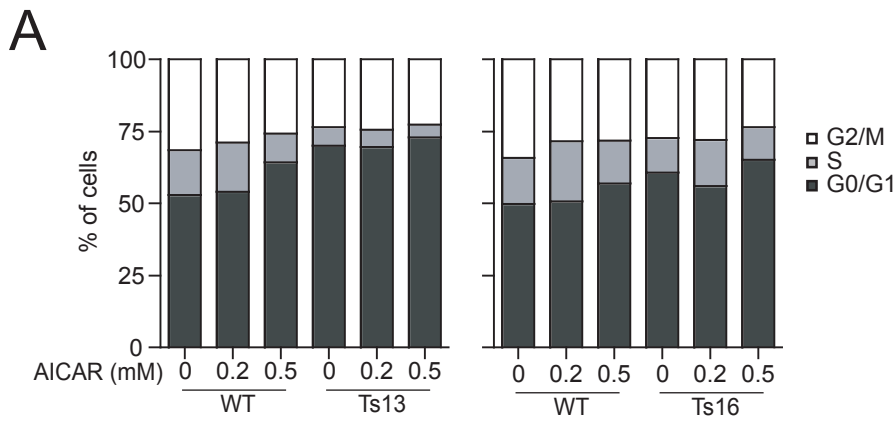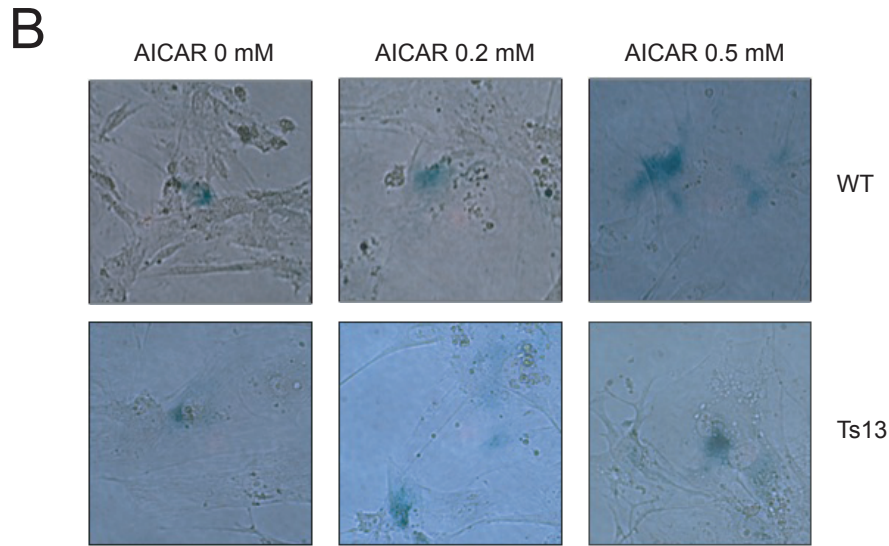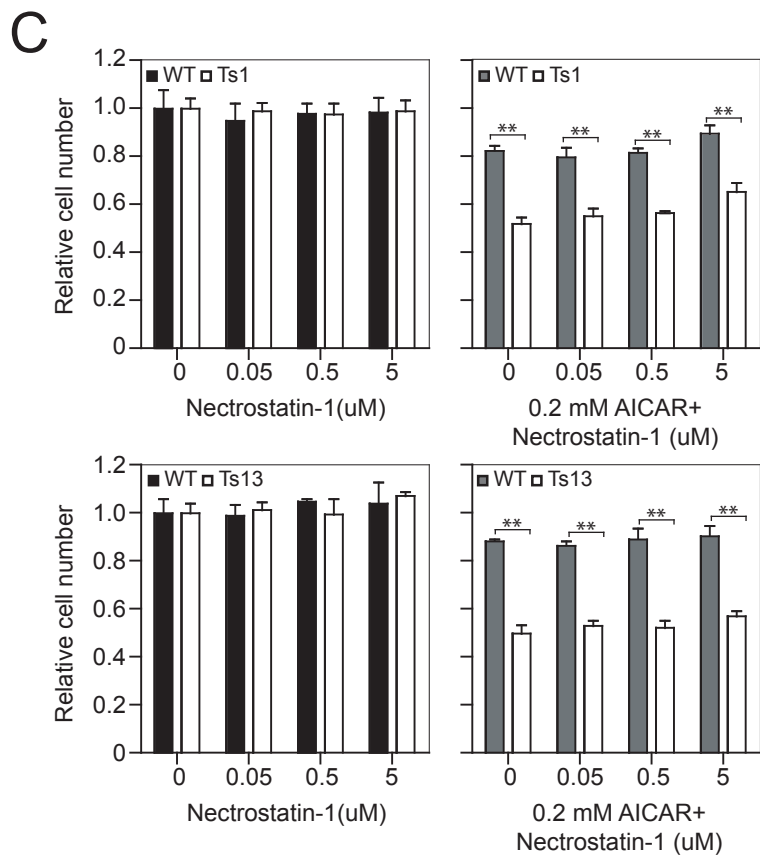

## Figure S3, related to Figure 3

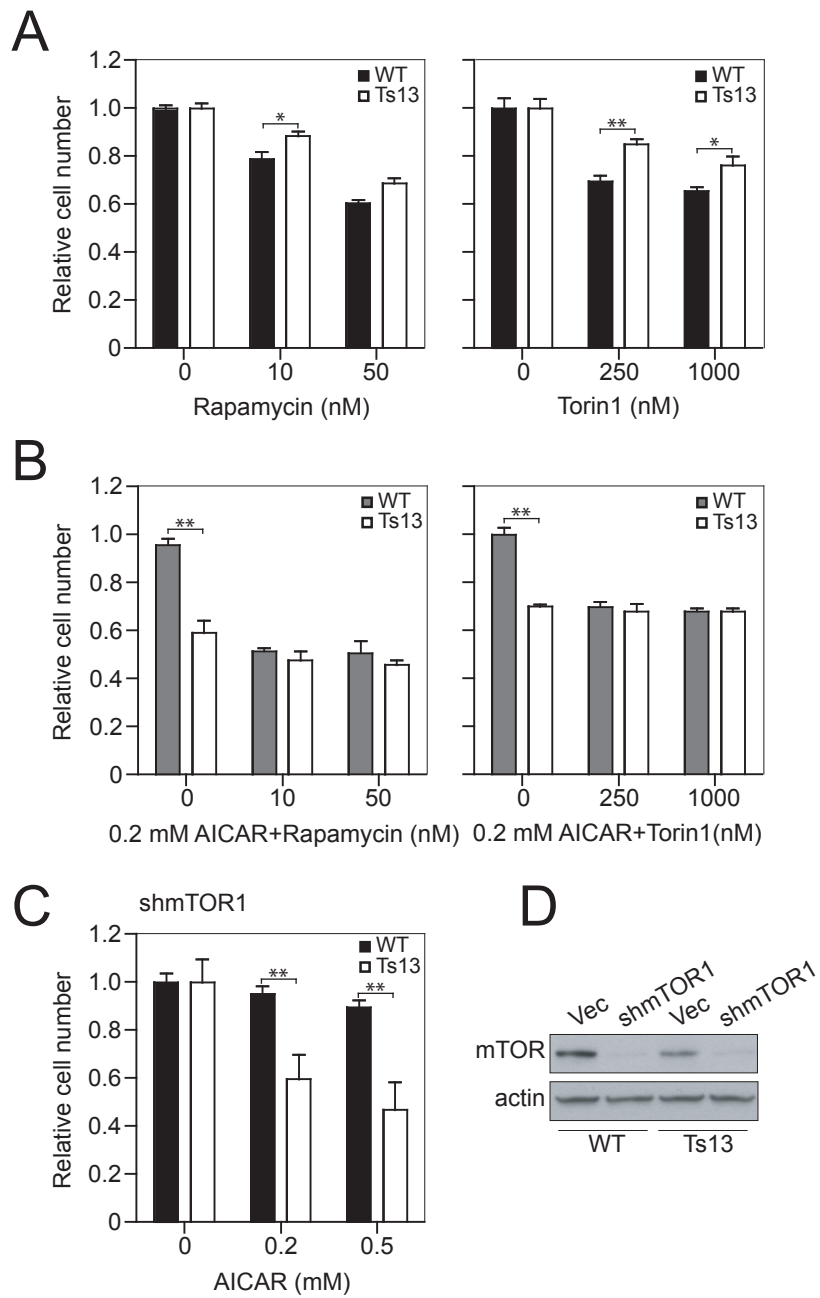

## Figure S4, related to Figure 6C and D

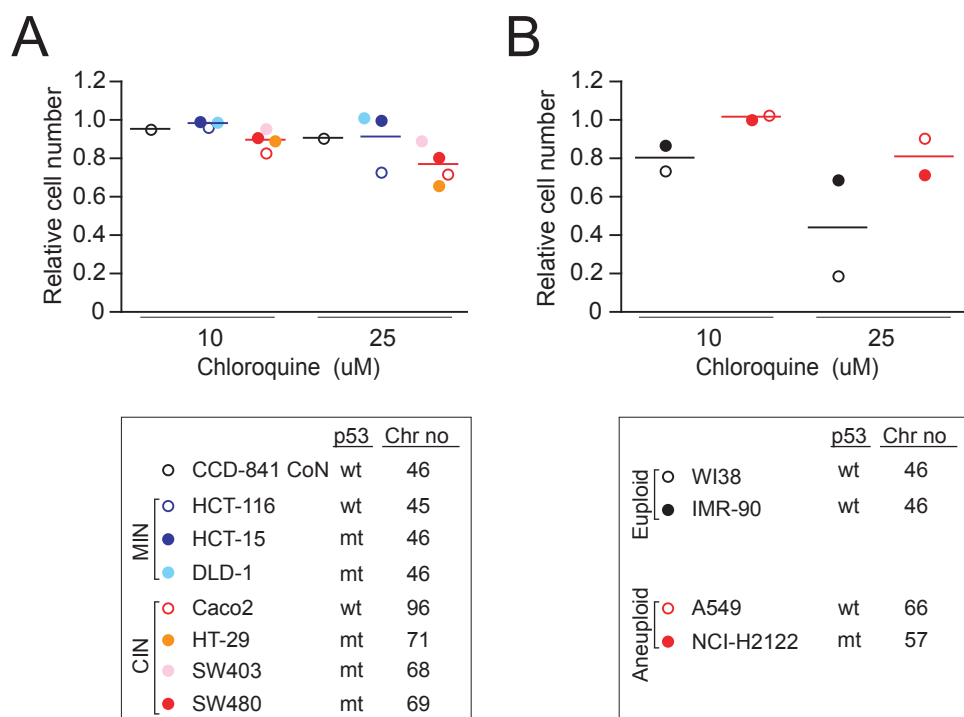



# Figure S6, related to Figure 4

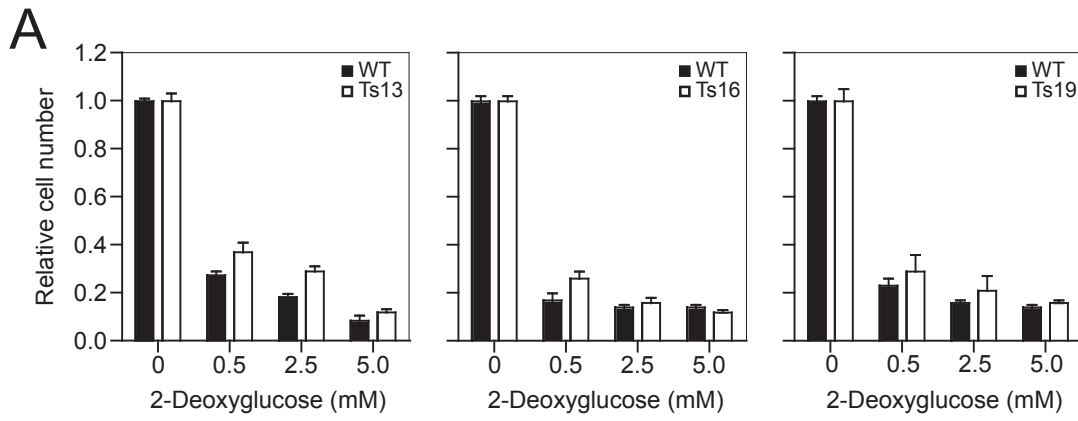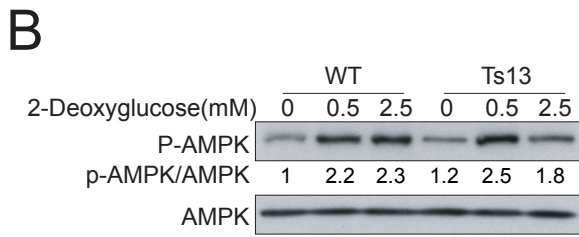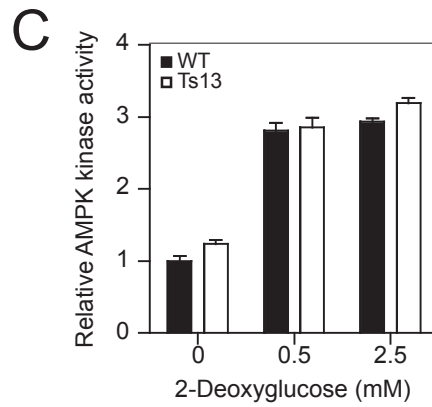

## Figure S7, related to Figure 3

A

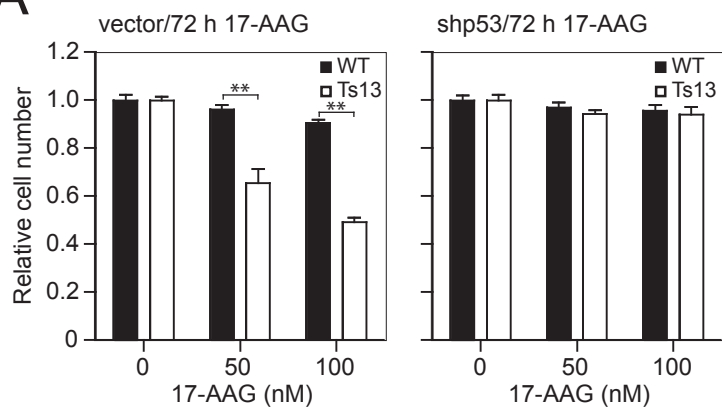

B

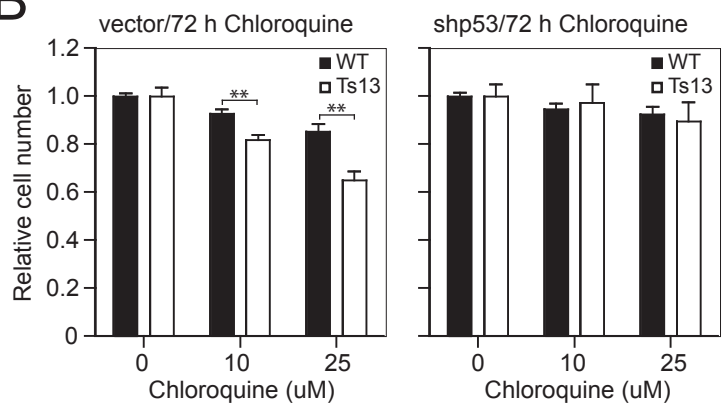

## Table S1, related to Figure 1 and 2

Effects of selected compounds on euploid (WT) and trisomic (Ts) MEFs.

| Agent              | Target             | [C]                                       | Ratio of treated/ untreated |              |                |              |                |              |                |              |                |
|--------------------|--------------------|-------------------------------------------|-----------------------------|--------------|----------------|--------------|----------------|--------------|----------------|--------------|----------------|
|                    |                    |                                           | WT                          | Ts1          | WT             | Ts13         | WT             | Ts16         | WT             | Ts19         |                |
| DNA damage         | Aphidicolin        | DNA Polymerase $\alpha, \delta, \epsilon$ | 1 $\mu$ M                   | 22 $\pm$ 0.7 | 43 $\pm$ 3.9** | 41 $\pm$ 3.4 | 67 $\pm$ 1.4** | 48 $\pm$ 3.2 | 47 $\pm$ 1.6   | 34 $\pm$ 1.8 | 31 $\pm$ 2.6   |
|                    | Camptothecin       | Topoisomerase 1                           | 100 nM                      | 93 $\pm$ 4.3 | 99 $\pm$ 5.6   | 98 $\pm$ 3.7 | 94 $\pm$ 1.4   | 86 $\pm$ 2.9 | 92 $\pm$ 2.5** | n.a.         | n.a.           |
|                    | Cisplatin          | DNA                                       | 10 $\mu$ M                  | n.a.         | n.a.           | 26 $\pm$ 2.8 | 18 $\pm$ 2.4   | 23 $\pm$ 3.6 | 22 $\pm$ 1.7   | n.a.         | n.a.           |
|                    | Doxorubicin        | DNA                                       | 50 ng/ml                    | n.a.         | n.a.           | 35 $\pm$ 2.0 | 54 $\pm$ 1.8** | 39 $\pm$ 2.9 | 46 $\pm$ 3.6** | 38 $\pm$ 4.3 | 36 $\pm$ 3.0   |
|                    | Hydroxyurea        | ribonucleoside diphosphate reductase      | 100 $\mu$ M                 | n.a.         | n.a.           | 68 $\pm$ 3.9 | 65 $\pm$ 4.2   | n.a.         | n.a.           | n.a.         | n.a.           |
| Proteotoxic stress | <b>17-AAG</b>      | Hsp90                                     | 100 nM                      | 87 $\pm$ 2.4 | 35 $\pm$ 3.5** | 90 $\pm$ 5.0 | 70 $\pm$ 2.4** | 86 $\pm$ 4.0 | 78 $\pm$ 1.9** | 92 $\pm$ 4.0 | 78 $\pm$ 3.7*  |
|                    | Cycloheximide      | Ribosome                                  | 50 ng/ml                    | n.a.         | n.a.           | 68 $\pm$ 3.1 | 62 $\pm$ 2.9*  | 60 $\pm$ 0.5 | 69 $\pm$ 2.6** | 58 $\pm$ 1.5 | 44 $\pm$ 2.0** |
|                    | <b>Chloroquine</b> | Lysosome                                  | 25 $\mu$ M                  | 69 $\pm$ 6.0 | 15 $\pm$ 6.4** | 90 $\pm$ 1.5 | 70 $\pm$ 2.5** | 89 $\pm$ 2.6 | 79 $\pm$ 3.6** | 79 $\pm$ 1.4 | 66 $\pm$ 2.4*  |
|                    | Lactacystin        | Proteasome                                | 10 $\mu$ M                  | n.a.         | n.a.           | 77 $\pm$ 0.5 | 70 $\pm$ 5.2*  | 63 $\pm$ 3.6 | 79 $\pm$ 3.2** | 63 $\pm$ 2.1 | 33 $\pm$ 1.3** |
|                    | MG132              | Proteasome                                | 0.5 $\mu$ M                 | 31 $\pm$ 1.6 | 42 $\pm$ 2.2** | 40 $\pm$ 1.8 | 48 $\pm$ 1.1*  | 47 $\pm$ 2.7 | 51 $\pm$ 3.7   | 30 $\pm$ 1.6 | 32 $\pm$ 1.8   |
|                    | Puromycin          | Ribosome                                  | 0.2 $\mu$ g/ml              | n.a.         | n.a.           | 83 $\pm$ 4.3 | 54 $\pm$ 4.0** | 73 $\pm$ 2.8 | 83 $\pm$ 3.1** | 77 $\pm$ 3.8 | 69 $\pm$ 4.4*  |
|                    | Tunicamycin        | GlcNAc phospho-transferase (GPT)          | 50 ng/ml                    | n.a.         | n.a.           | 80 $\pm$ 4.1 | 77 $\pm$ 3.5   | 88 $\pm$ 5.0 | 87 $\pm$ 6.7   | 75 $\pm$ 1.9 | 76 $\pm$ 3.8   |
| Energy stress      | <b>AICAR</b>       | AMPK                                      | 0.5 mM                      | 77 $\pm$ 2.8 | 29 $\pm$ 2.3** | 64 $\pm$ 4.1 | 30 $\pm$ 4.1** | 70 $\pm$ 4.1 | 47 $\pm$ 7.8** | 77 $\pm$ 2.3 | 70 $\pm$ 2.2*  |
|                    | Compound C         | AMPK                                      | 5 $\mu$ M                   | 73 $\pm$ 2.4 | 98 $\pm$ 6.3** | 45 $\pm$ 3.3 | 78 $\pm$ 6.3** | 60 $\pm$ 2.2 | 72 $\pm$ 3.2** | 61 $\pm$ 3.  | 62 $\pm$ 3.0   |
|                    | 2-Deoxyglucose     | hexokinase                                | 2.5 mM                      | n.a.         | n.a.           | 18 $\pm$ 1.4 | 29 $\pm$ 2.2** | 14 $\pm$ 1.0 | 16 $\pm$ 2.0   | 16 $\pm$ 0.1 | 21 $\pm$ 6.0   |
|                    | Metformin          | AMPK                                      | 1 mM                        | n.a.         | n.a.           | 86 $\pm$ 2.4 | 73 $\pm$ 2.9** | 82 $\pm$ 2.1 | 72 $\pm$ 2.4** | n.a.         | n.a.           |
|                    | Rapamycin          | mTOR                                      | 10 nM                       | 48 $\pm$ 3.4 | 61 $\pm$ 1.2** | 60 $\pm$ 1.5 | 69 $\pm$ 2.1*  | 51 $\pm$ 1.4 | 55 $\pm$ 1.6   | 53 $\pm$ 3.0 | 54 $\pm$ 2.4   |
|                    | Torin1             | mTOR                                      | 250 nM                      | 73 $\pm$ 1.4 | 86 $\pm$ 5.4** | 69 $\pm$ 2.4 | 85 $\pm$ 2.0** | n.a.         | n.a.           | n.a.         | n.a.           |

\* $P$ <0.05, \*\* $P$ <0.005, t testGrowth improvement  $\geq$  5% is shown in greenGrowth inhibition  $\geq$  5% is shown in red



# Table S2

shRNA sequences used in this study

| shRNA               | Sense sequence        |
|---------------------|-----------------------|
| AMPK $\alpha$ .1623 | CCAGGAAGTCATACAATAGAA |
| Beclin1.1147        | CTGGAGTCTCTGACAGACAAA |
| mTOR.6309           | CAGGCATATGGCCGAGATTTA |
| p53.1224            | CCACTACAAGTACATGTGTAA |

# Table S3, related to Figure 5

Primers used for quantitative Real-Time PCR

| Gene    | Forward primer          | Reverse primer          |
|---------|-------------------------|-------------------------|
| Atg1    | 5'-agccctggatgagatgtttc | 5'-atgggtgacagaaccaagac |
| Atg4    | 5'-attgctgtggggttttctg  | 5'-aaccccaggatttcagagg  |
| Beclin1 | 5'-tggccaataagatgggtctg | 5'-tgcctccagtgtctcaatc  |
| LC3     | 5'-tggacaagaccaagttcctg | 5'-agccattgctgtcccgaatg |
| Atg12   | 5'-ttcctaaactggtgcctc   | 5'-acagcaccgaaatgtctctg |
| Bnip3   | 5'-tccactagcaccttctgatg | 5'-caggaacaccgcatttacag |
| Gaprpl1 | 5'-cgtggagaaggctcctaaag | 5'-atacagctggcccatggtag |
| Rpl19   | 5'-aagcctgtgactgtccattc | 5'-cttcttgattcccgtatc   |
